# Supplementary material for: Decadal O3 variability at the Mt. Cimone WMO/GAW global station (2,165 m a.s.l., Italy) and comparison with two high-mountain “reference” sites in Europe
Source: Oxford University Press journal article supplement (doi:10.1525/elementa.00042), 2020-01-01
Supplement: supplemental_material.docx [file supplemental_material.docx]

Supplemental Materials

Decadal O3 variability at the Mt. Cimone WMO/GAW global station (2165 m a.s.l., Italy) and comparison with two high-mountain “reference” sites in Europe

P. Cristofanelli1,*, F. Fierli2, F. Graziosi2, M. Steinbacher3, C. Couret4, F.Calzolari1, F. Roccato1, T. Landi1, D. Putero1, P. Bonasoni1

1 CNR-ISAC, Via Gobetti 101, 40129 Bologna (Italy)

2 CNR-ISAC, Via Fosso del Cavaliere 101, 40129 Rome (Italy)

3 Empa, Ueberlandstrasse 129, 8600 Duebendorf (Switzerland)

4 German Environment Agency (UBA), Zugspitze 5, 82475 Zugspitze (Germany)

*Corresponding author e-mail: p.cristofanelli@isac.cnr.it

**List of Contents:**

**Figure S1. Title.** Locations of the measurement sites. Red triangle indicates Mt. Cimone (CMN), orange triangle indicates Febbio (FEB), blue triangle indicates Jungfraujoch (JFJ) and green triangle indicates Zugspitze (ZUG/ZSF).

**Figure S2. Title.** Comparison of O3 monthly mean values at ZSF and ZUG for the period 2002 – 2010.Red (cyan) plot denotes ZSF (ZUG) observations. The vertical bars indicate the 95Th confidence level.

**Figure S3. Title.** Spatial distribution of the air-quality stations included in the AirBase dataset. Red points indicates stations in the NI region, purple in the WE region, green in the CWE region, orange in the CEE region and cyan in the MED region.

**Figure S4. Title.** Not Robust STL decomposition for CMN. Time-series of monthly O3 averages (“data”), seasonal component (“seasonal”), Loess smoothing (“trend”) and residuals (“reminder) for CMN. STL has been run by replacing the seasonal smoothing by taking the mean seasonal cycle (left) and by setting the seasonal smoothing parameter t = 7 (right).

**Figure S5. Title.** Robust STL decomposition for CMN. Time-series of monthly O3 averages (“data”), seasonal component (“seasonal”), Loess smoothing (“trend”) and residuals (“reminder) for CMN. Robust STL has been run by replacing the seasonal smoothing by taking the mean seasonal cycle (left) and by setting the seasonal smoothing parameter t = 7 (right). The red crosses denotes points identified as “outliers”.

**Figure S6. Title.** Not robust STL decomposition for JFJ. Time-series of monthly O3 averages (“data”), seasonal component (“seasonal”), Loess smoothing (“trend”) and residuals (“reminder) for JFJ. STL has been run by replacing the seasonal smoothing by taking the mean seasonal cycle (left) and by setting the seasonal smoothing parameter t = 7 (right).

**Figure S7. Title.** Robust STL decomposition for JFJ. Time-series of monthly O3 averages (“data”), seasonal component (“seasonal”), Loess smoothing (“trend”) and residuals (“reminder) for JFJ. Robust STL has been run by replacing the seasonal smoothing by taking the mean seasonal cycle (left) and by setting the seasonal smoothing parameter t = 7 (right). The red crosses denotes points identified as “outliers”.

**Figure S8.** **Title** .Not robust STL decomposition for ZUG/ZSF. Time-series of monthly O3 averages (“data”), seasonal component (“seasonal”), Loess smoothing (“trend”) and residuals (“reminder) for JFJ. ZUG/ZSF has been run by replacing the seasonal smoothing by taking the mean seasonal cycle (left) and by setting the seasonal smoothing parameter t = 7 (right).

**Figure S9.** **Title**. Robust STL decomposition for ZUG/ZSF. Time-series of monthly O3 averages (“data”), seasonal component (“seasonal”), Loess smoothing (“trend”) and residuals (“reminder) for ZUG/ZSF. Robust STL has been run by replacing the seasonal smoothing by taking the mean seasonal cycle (left) and by setting the seasonal smoothing parameter t = 7 (right). The red crosses denotes points identified as “outliers”.

**Figure S10**. **Title.** Artificial O3 time series at CMN. The period of the “persistent” O3 episodes (orange shaded area) was substituted with an artificial time series obtained by applying the “robust” periodic STL decomposition to the original monthly O3 time series.

**Figure S11. Title.** Linear correlation matrix between the seasonal O3, O3 at CMN, O3 at JFJ and the SRRtot/SRRreg values for the different source regions at both the measurement sites (DJF 1996 – 2016). The shape of ellipses provides a visual representation of the scatter plot for each couple of variables, the numbers and the colour code give representation of the R value (green: negative slope of correlation, red: positive slope of correlation).

**Figure S12. Title.** Linear correlation matrix between the seasonal O3, O3 at CMN, O3 at JFJ and the SRRtot/SRRreg values for the different source regions at both the measurement sites (MAM 1996 – 2016).

The shape of ellipses provides a visual representation of the scatter plot for each couple of variables, the numbers and the colour code give representation of the R value (green: negative slope of correlation, red: positive slope of correlation).

**Figure S13. Title.** Linear correlation matrix between the seasonal O3, O3 at CMN, O3 at JFJ and the SRRtot/SRRreg values for the different source regions at both the measurement sites (JJA 1996 – 2016). The shape of ellipses provides a visual representation of the scatter plot for each couple of variables, the numbers and the colour code give representation of the R value (green: negative slope of correlation, red: positive slope of correlation).

**Figure S14. Title.** Linear correlation matrix between the seasonal O3, O3 at CMN, O3 at JFJ and the SRRtot/SRRreg values for the different source regions at both the measurement sites (SON 1996 – 2016). The shape of ellipses provides a visual representation of the scatter plot for each couple of variables, the numbers and the colour code give representation of the R value (green: negative slope of correlation, red: positive slope of correlation).

**Figure S15. Title.** Time series of average monthly O3 values and monthly percentiles for the five “source” regions. Monthly mean values are reported by the green lines, monthly 5th percentiles by blue lines, 25th percentiles by the cyan lines, 75th percentiles by the orange lines and 95th percentiles by red lines.

**Figure S16. Title.** Time series of seasonal O3 anomalies for the CWE “source” region. nomalies of O3 mean seasonal values are reported by the green lines, monthly 5th percentiles by blue lines, 25th percentiles by the cyan lines, 75th percentiles by the orange lines and 95th percentiles by red lines. The orange shaded area denote the period of “persistent” O3 episodes at CMN.

**Figure S17. Title.** Time series of seasonal O3 anomalies for the WE “source” region. Anomalies of O3 mean seasonal values are reported by the green lines, monthly 5th percentiles by blue lines, 25th percentiles by the cyan lines, 75th percentiles by the orange lines and 95th percentiles by red lines. The orange shaded area denote the period of “persistent” O3 episodes at CMN.

**Figure S18. Title.** Time series of seasonal O3 anomalies for the CEE “source” region. Anomalies of O3 mean seasonal values are reported by the green lines, monthly 5th percentiles by blue lines, 25th percentiles by the cyan lines, 75th percentiles by the orange lines and 95th percentiles by red lines. The orange shaded area denote the period of “persistent” O3 episodes at CMN.

**Figure S19. Title.** Time series of seasonal O3 anomalies for the NI “source” region. Anomalies of O3 mean seasonal values are reported by the green lines, monthly 5th percentiles by blue lines, 25th percentiles by the cyan lines, 75th percentiles by the orange lines and 95th percentiles by red lines. The orange shaded area denote the period of “persistent” O3 episodes at CMN.

**Figure S20. Title.** Time series of seasonal O3 anomalies for the MED “source” region. Anomalies of O3 mean seasonal values are reported by the green lines, monthly 5th percentiles by blue lines, 25th percentiles by the cyan lines, 75th percentiles by the orange lines and 95th percentiles by red lines. The orange shaded area denote the period of “persistent” O3 episodes at CMN.

**Figure S21.** Analysis of the relationship between the seasonal difference of O3 between CMN and JFJ together with air mass transport contributions from the European “source” regions and the seasonal near-surface O3 anomalies over these regions. Scatterplots of mean seasonal differences of O3 at CMN and JFJ (Ozone), with SRRreg/SRRtot over the European “source” regions (i.e. CWE: Continental West Europe; WE: West Europe; CEE: Continental East Europe; NI: North Italy; MED: Mediterranean basin) as a function of the seasonal 95th percentiles of near-surface O3 over these regions (as deduced by the Airbase dataset analysis).

**Table S1**. O3 trends/tendencies based on observed O3 monthly values. Trend/tendency values are expressed as ppb/year. P-values are reported for the linear regression model and for the Mann – Kendall test. For the Theil-Sen estimator, the 95% confidence intervals obtained by the bootstrap analysis were reported. Different data selection are considered: all data, nighttime and daytime.


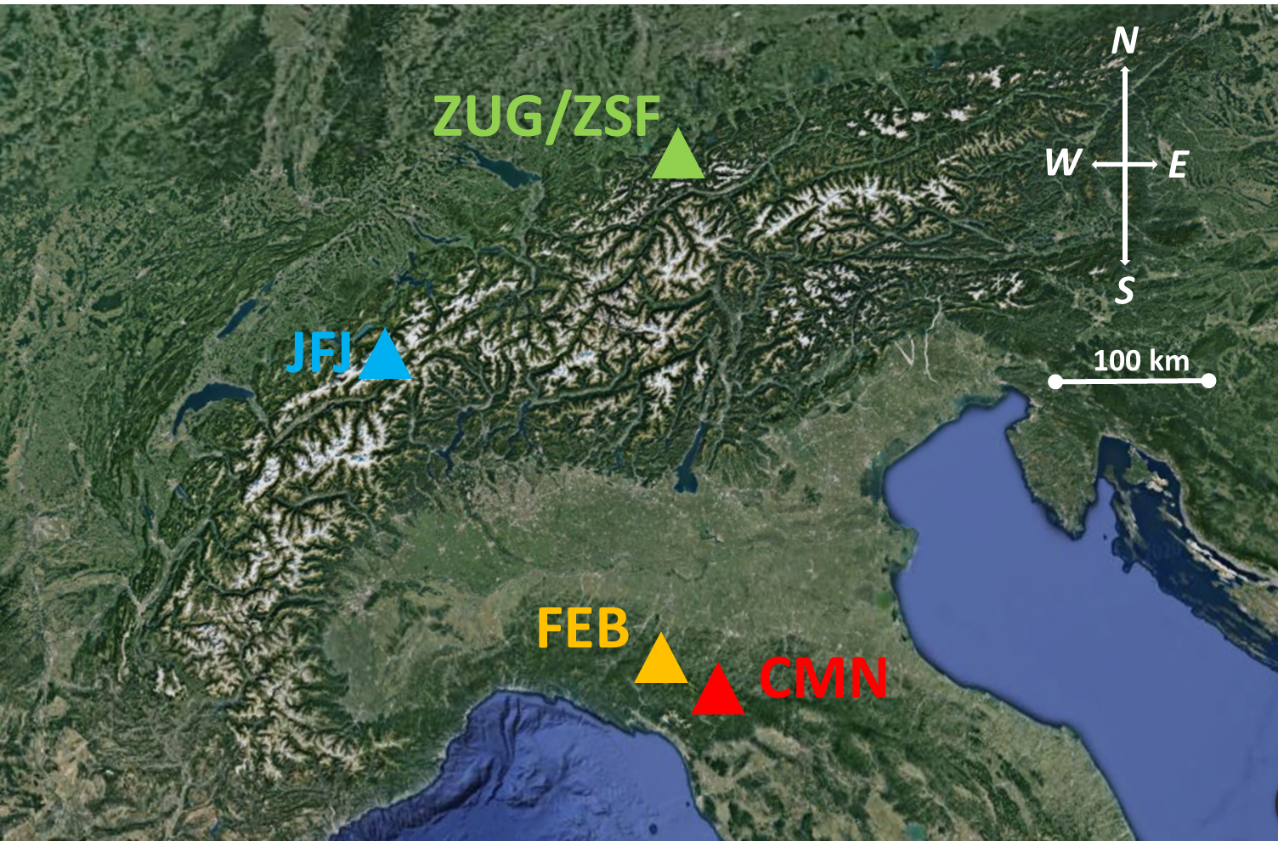


**Figure S1. Title.** Locations of the measurement sites. Red triangle indicates Mt. Cimone (CMN), orange triangle indicates Febbio (FEB), blue triangle indicates Jungfraujoch (JFJ) and green triangle indicates Zugspitze (ZUG/ZSF).


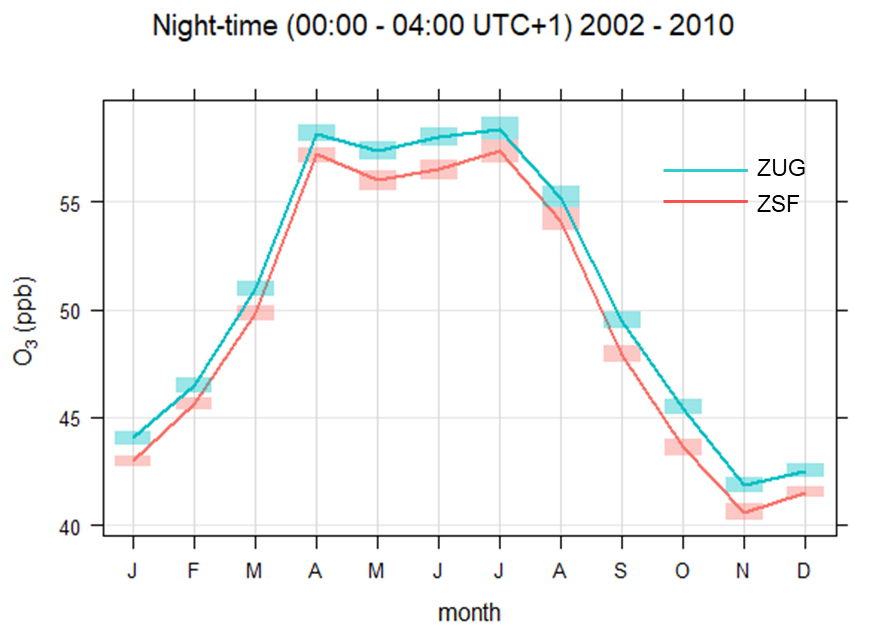


**Figure S2. Title.** Comparison of O3 monthly mean values at ZSF and ZUG for the period 2002 – 2010. Red (cyan) plot denotes ZSF (ZUG) observations. The vertical bars indicate the 95Th confidence level.


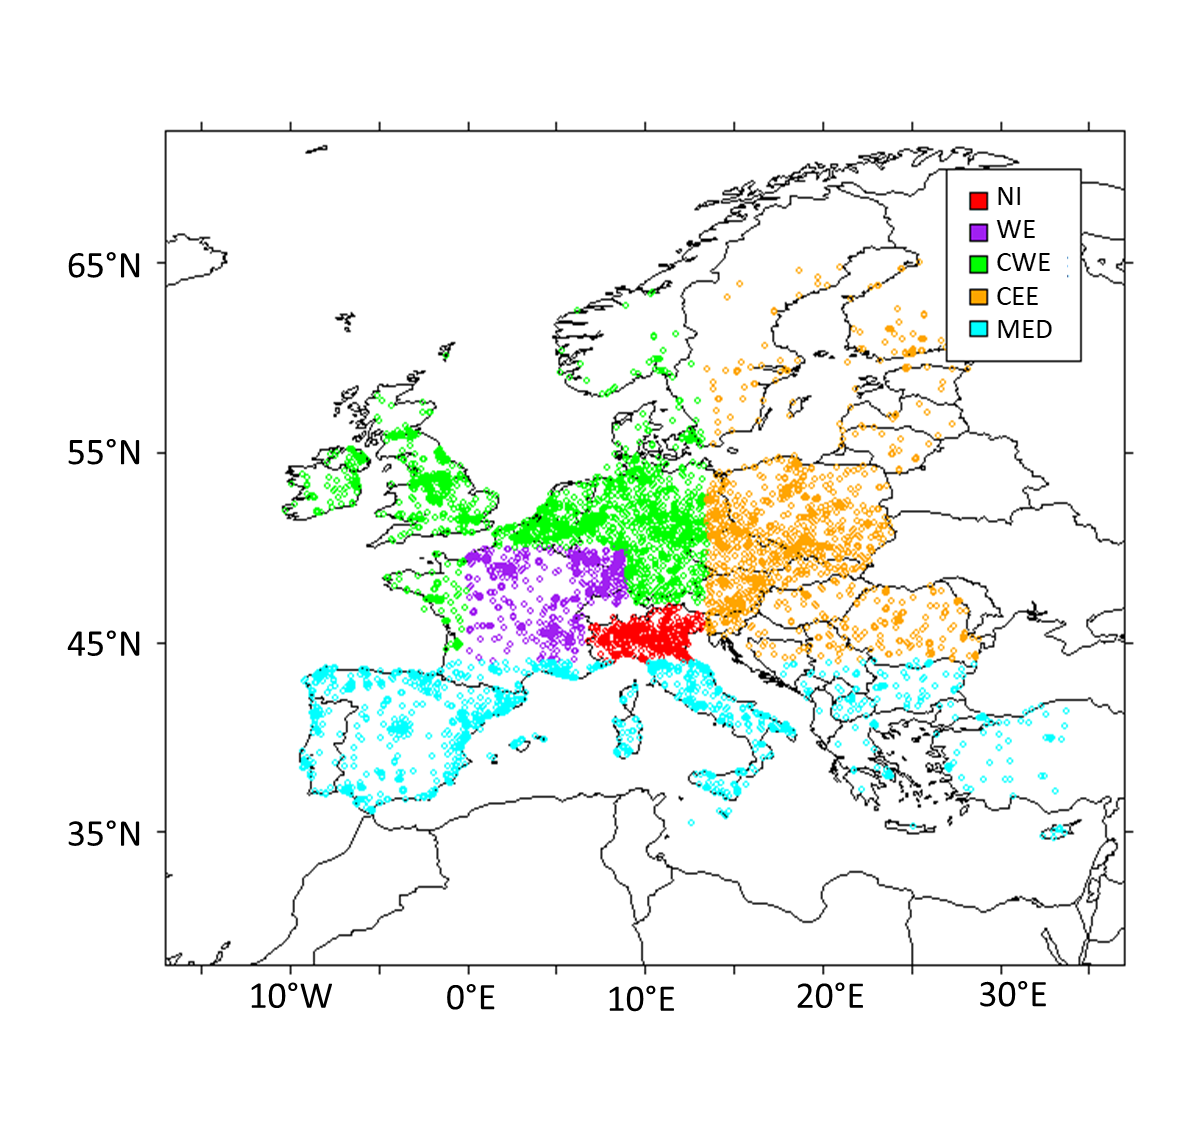


**Figure S3. Title.** Spatial distribution of the air-quality stations included in the AirBase dataset. Red points indicates stations in the NI region, purple in the WE region, green in the CWE region, orange in the CEE region and cyan in the MED region.


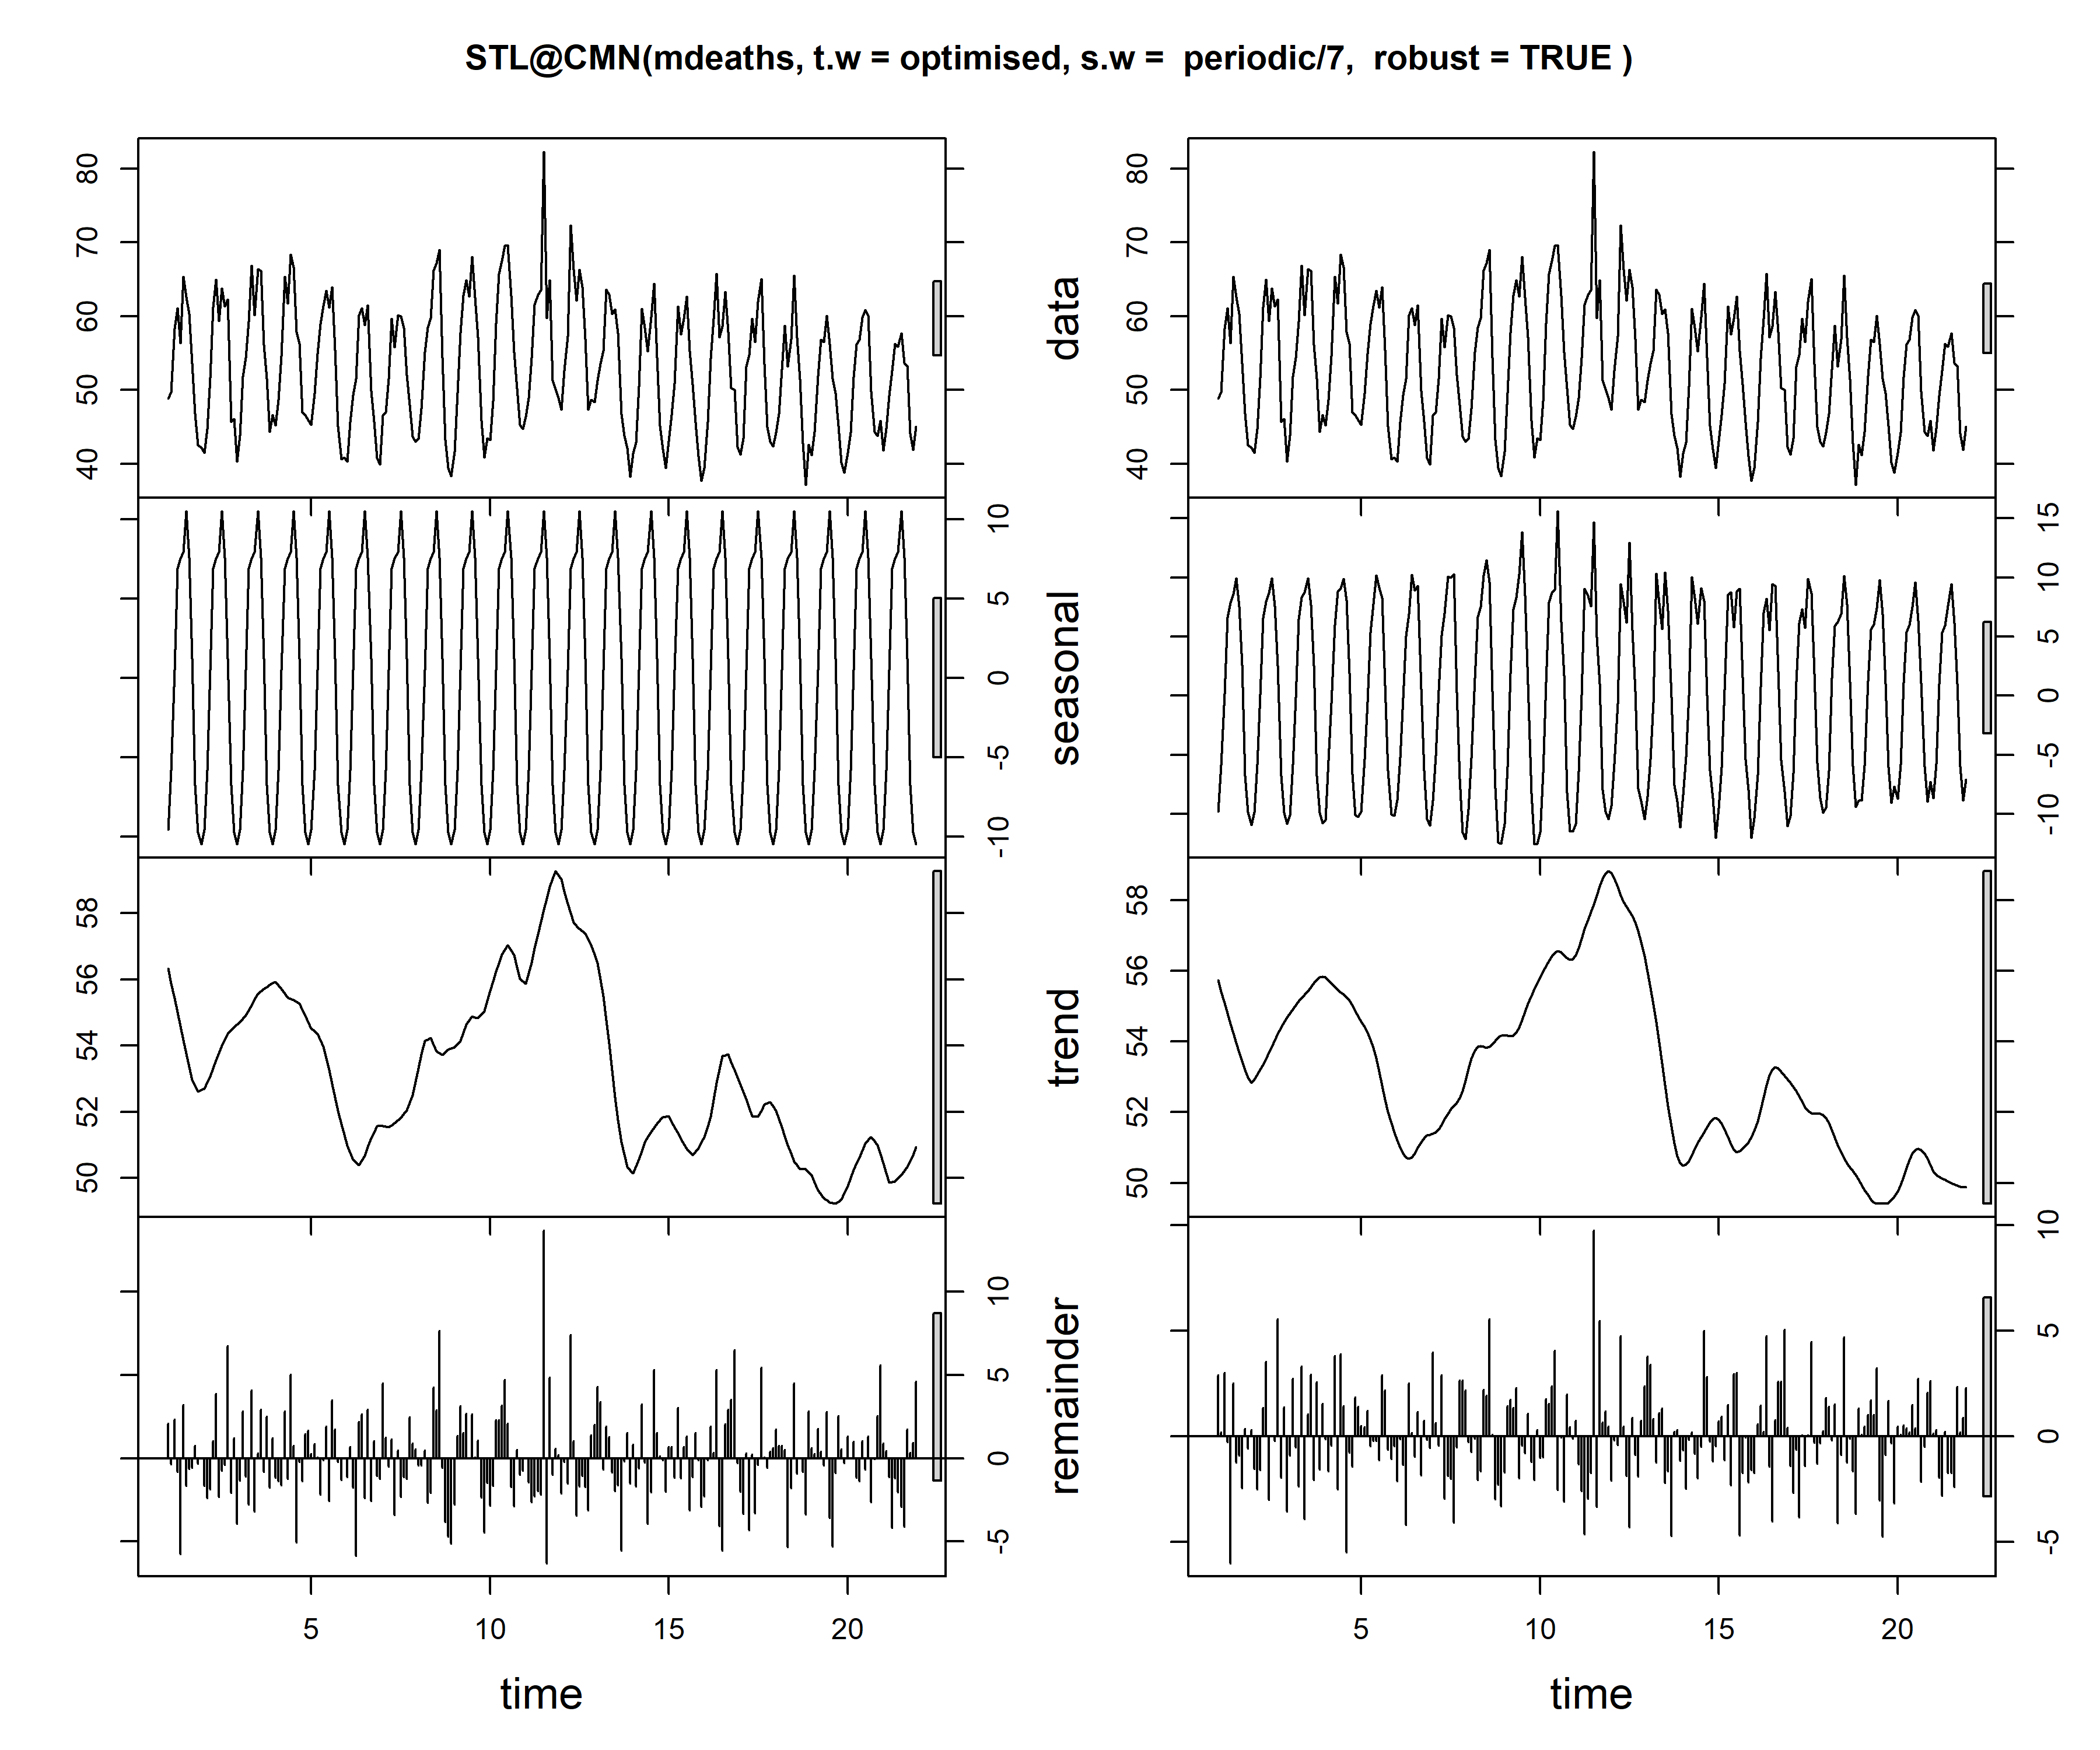


**Figure S4.** Not Robust STL decomposition for CMN. Time-series of monthly O3 averages (“data”), seasonal component (“seasonal”), Loess smoothing (“trend”) and residuals (“reminder) for CMN. STL has been run by replacing the seasonal smoothing by taking the mean seasonal cycle (left) and by setting the seasonal smoothing parameter t = 7 (right).


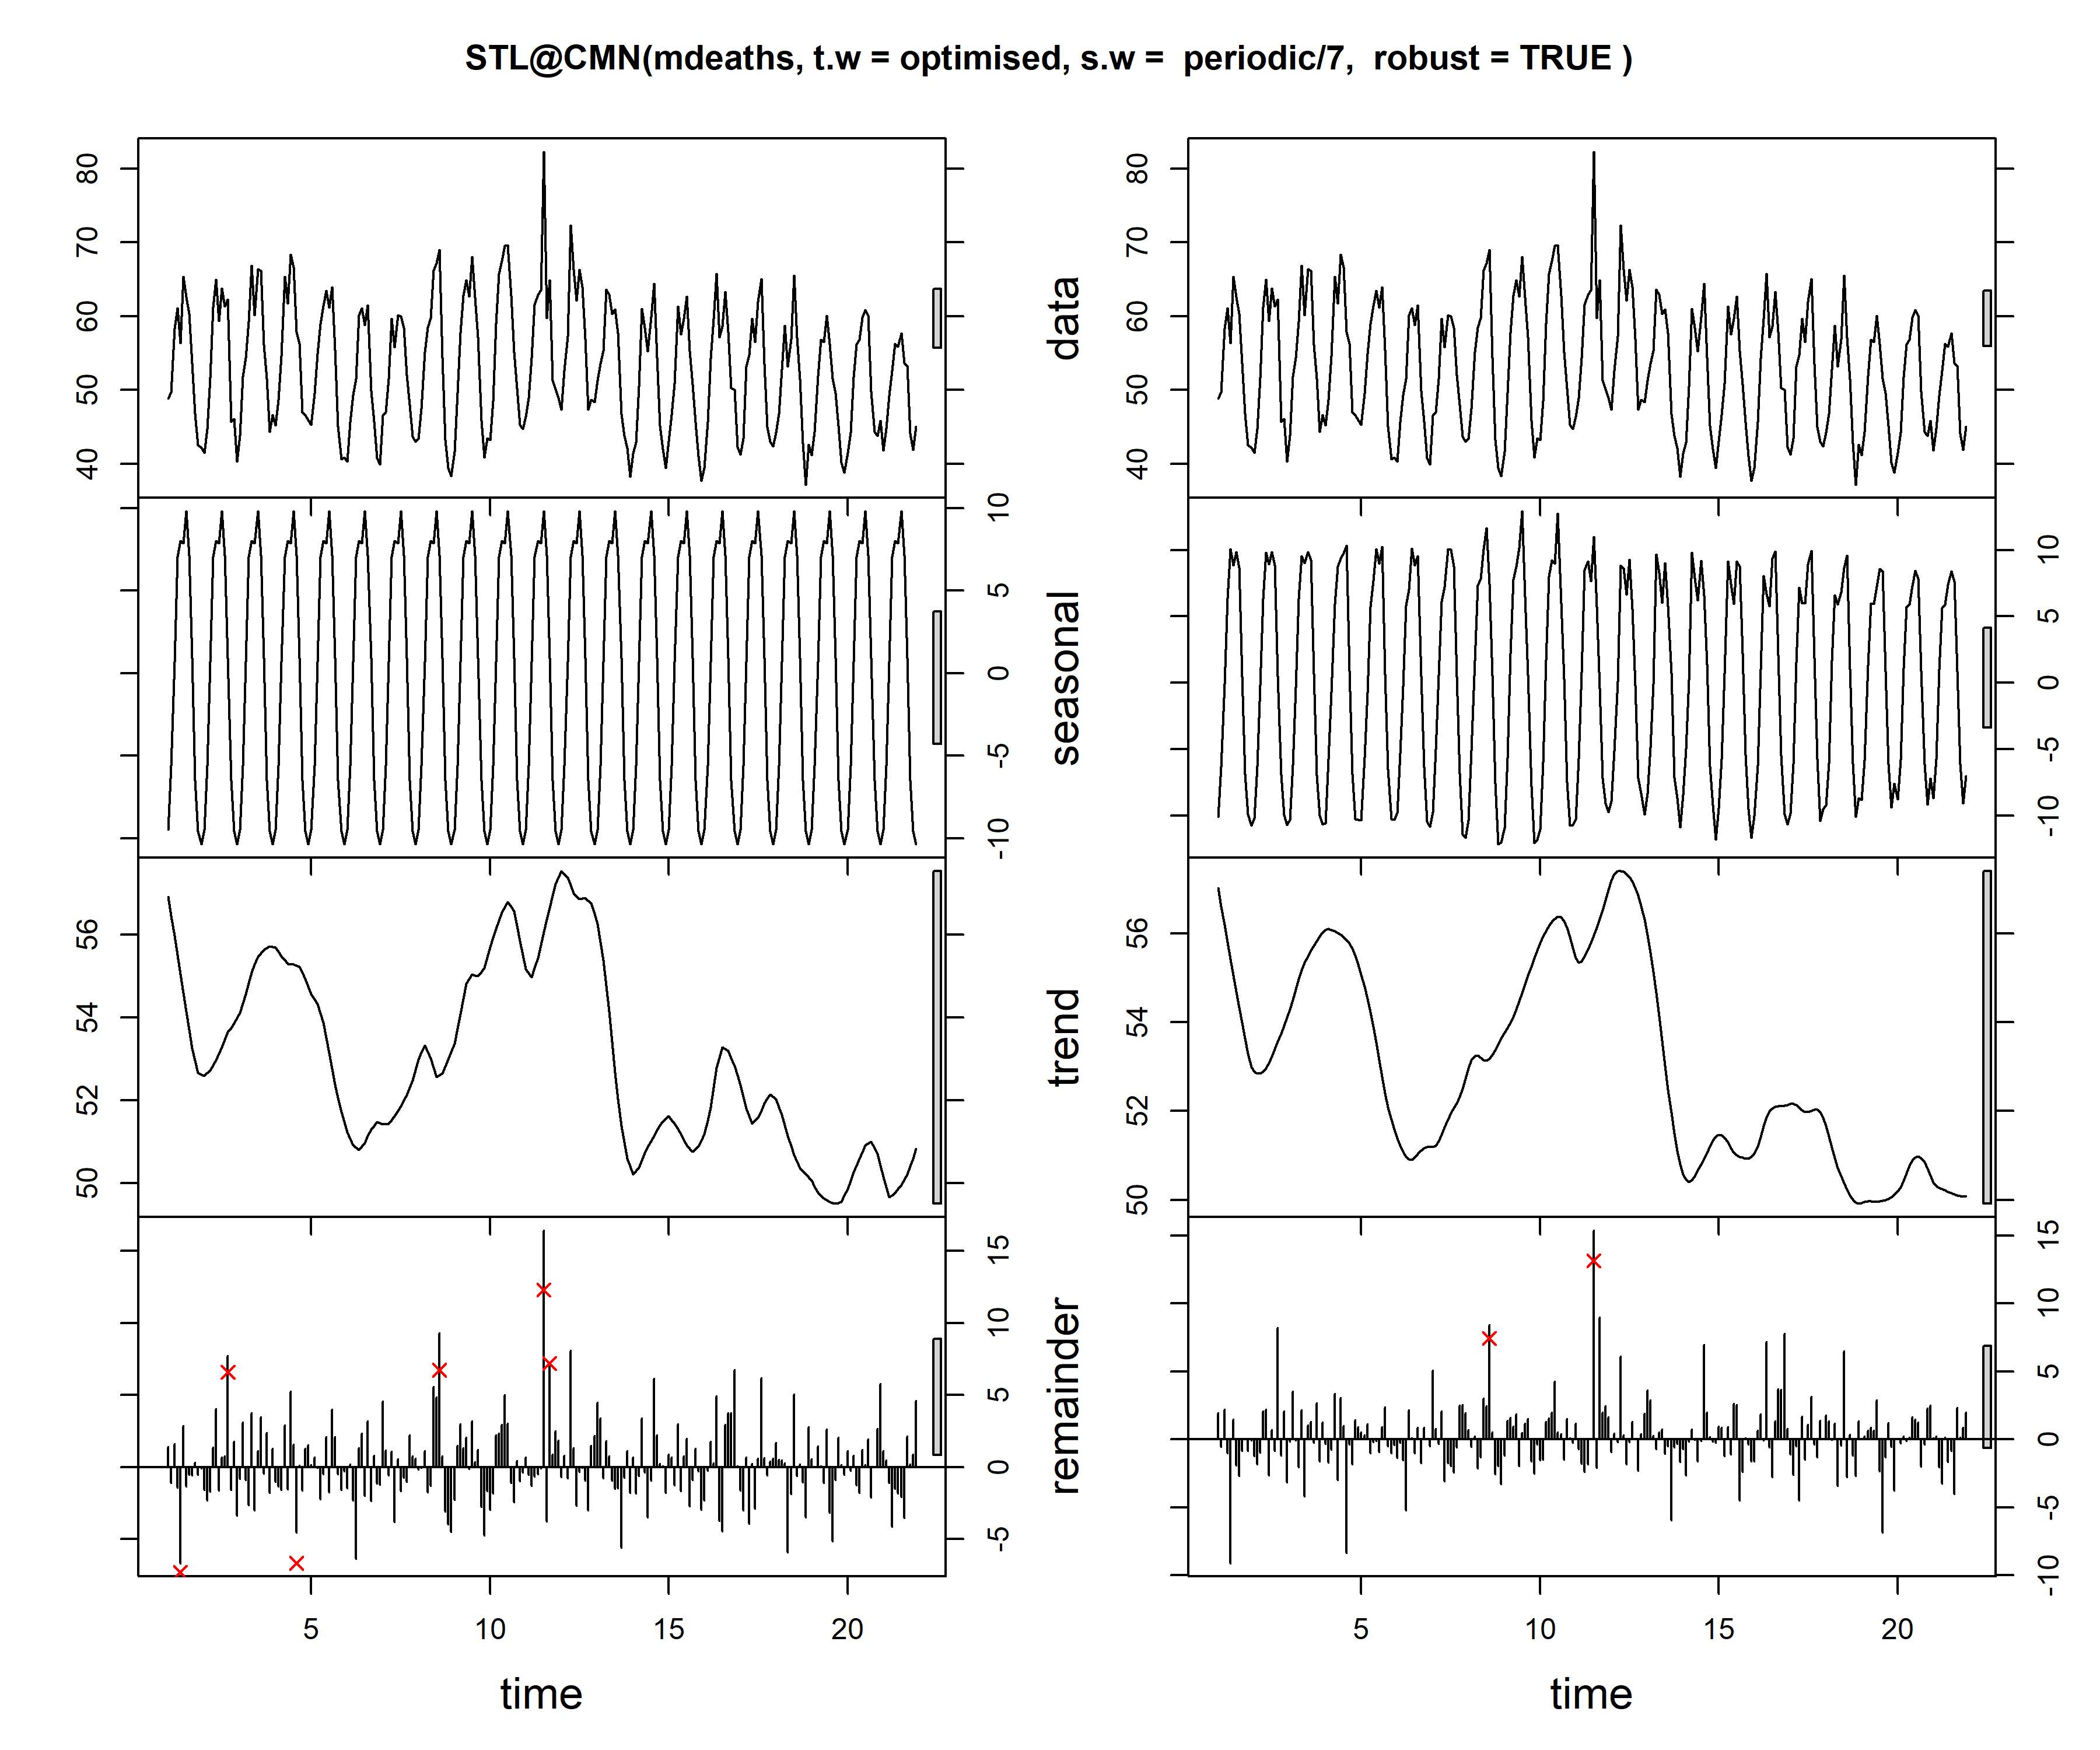


**Figure S5.** Robust STL decomposition for CMN. Time-series of monthly O3 averages (“data”), seasonal component (“seasonal”), Loess smoothing (“trend”) and residuals (“reminder) for CMN. Robust STL has been run by replacing the seasonal smoothing by taking the mean seasonal cycle (left) and by setting the seasonal smoothing parameter t = 7 (right). The red crosses denotes points identified as “outliers”.


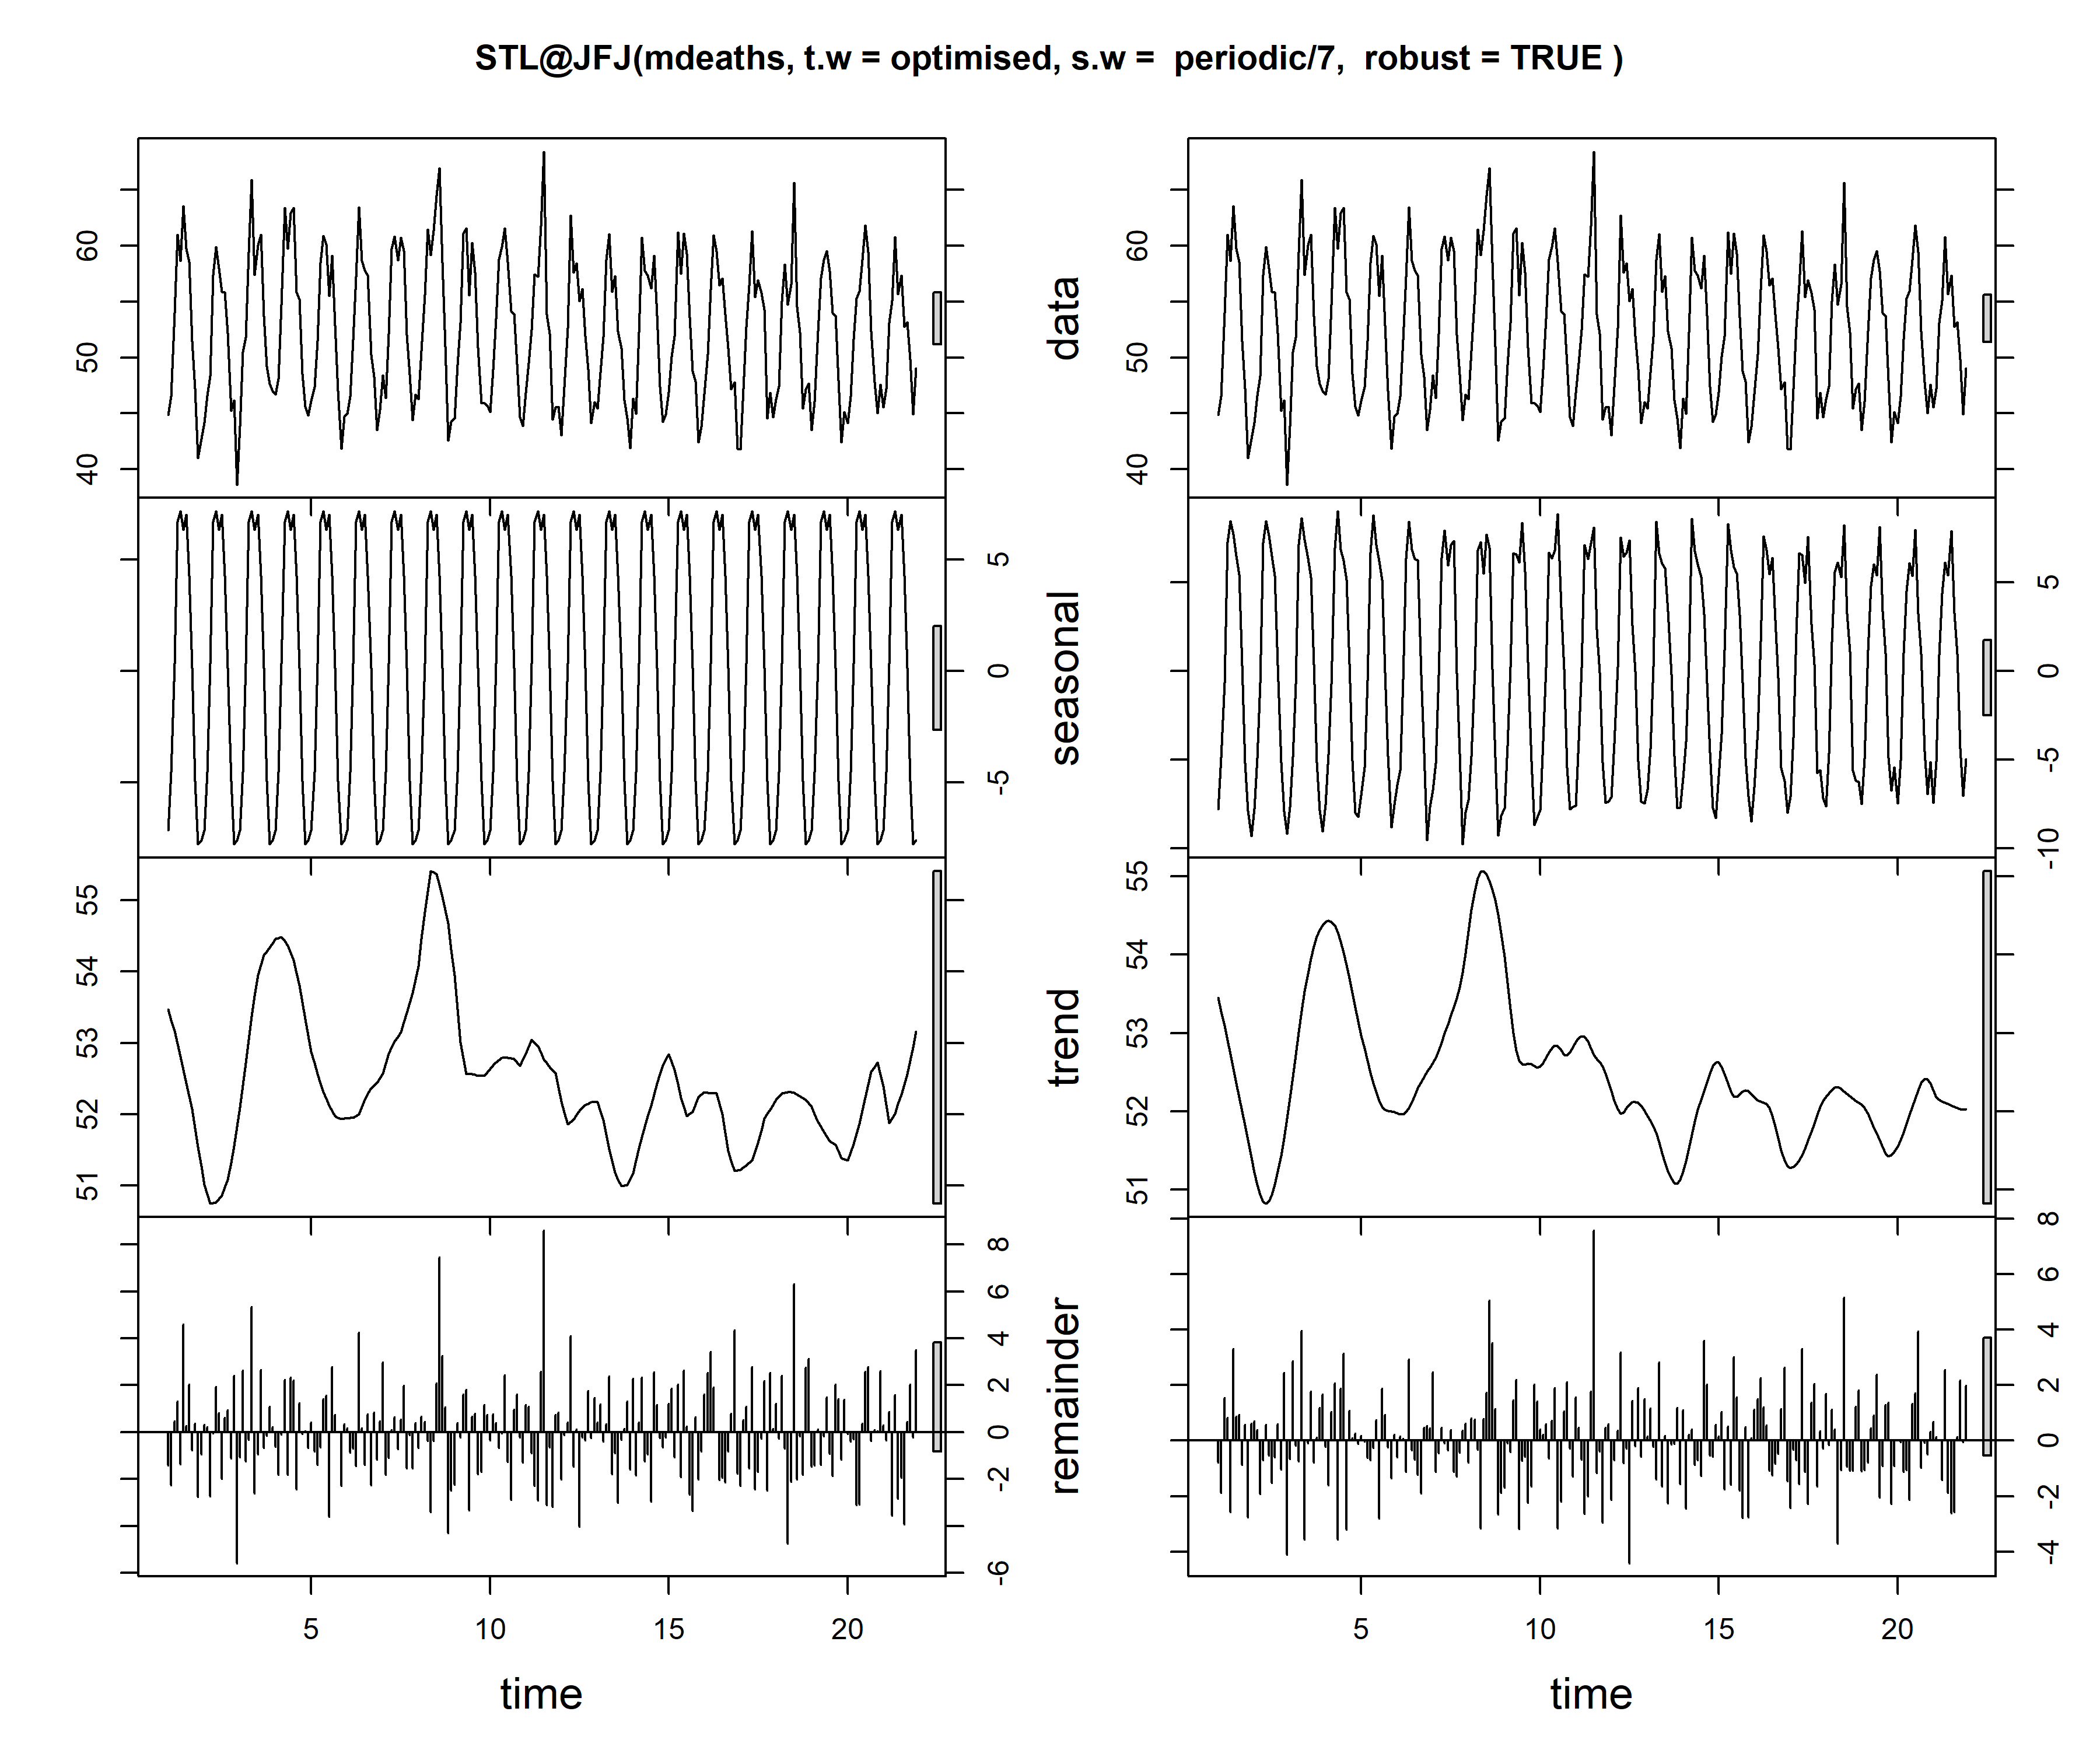


**Figure S6.** Not robust STL decomposition for JFJ. Time-series of monthly O3 averages (“data”), seasonal component (“seasonal”), Loess smoothing (“trend”) and residuals (“reminder) for JFJ. STL has been run by replacing the seasonal smoothing by taking the mean seasonal cycle (left) and by setting the seasonal smoothing parameter t = 7 (right).


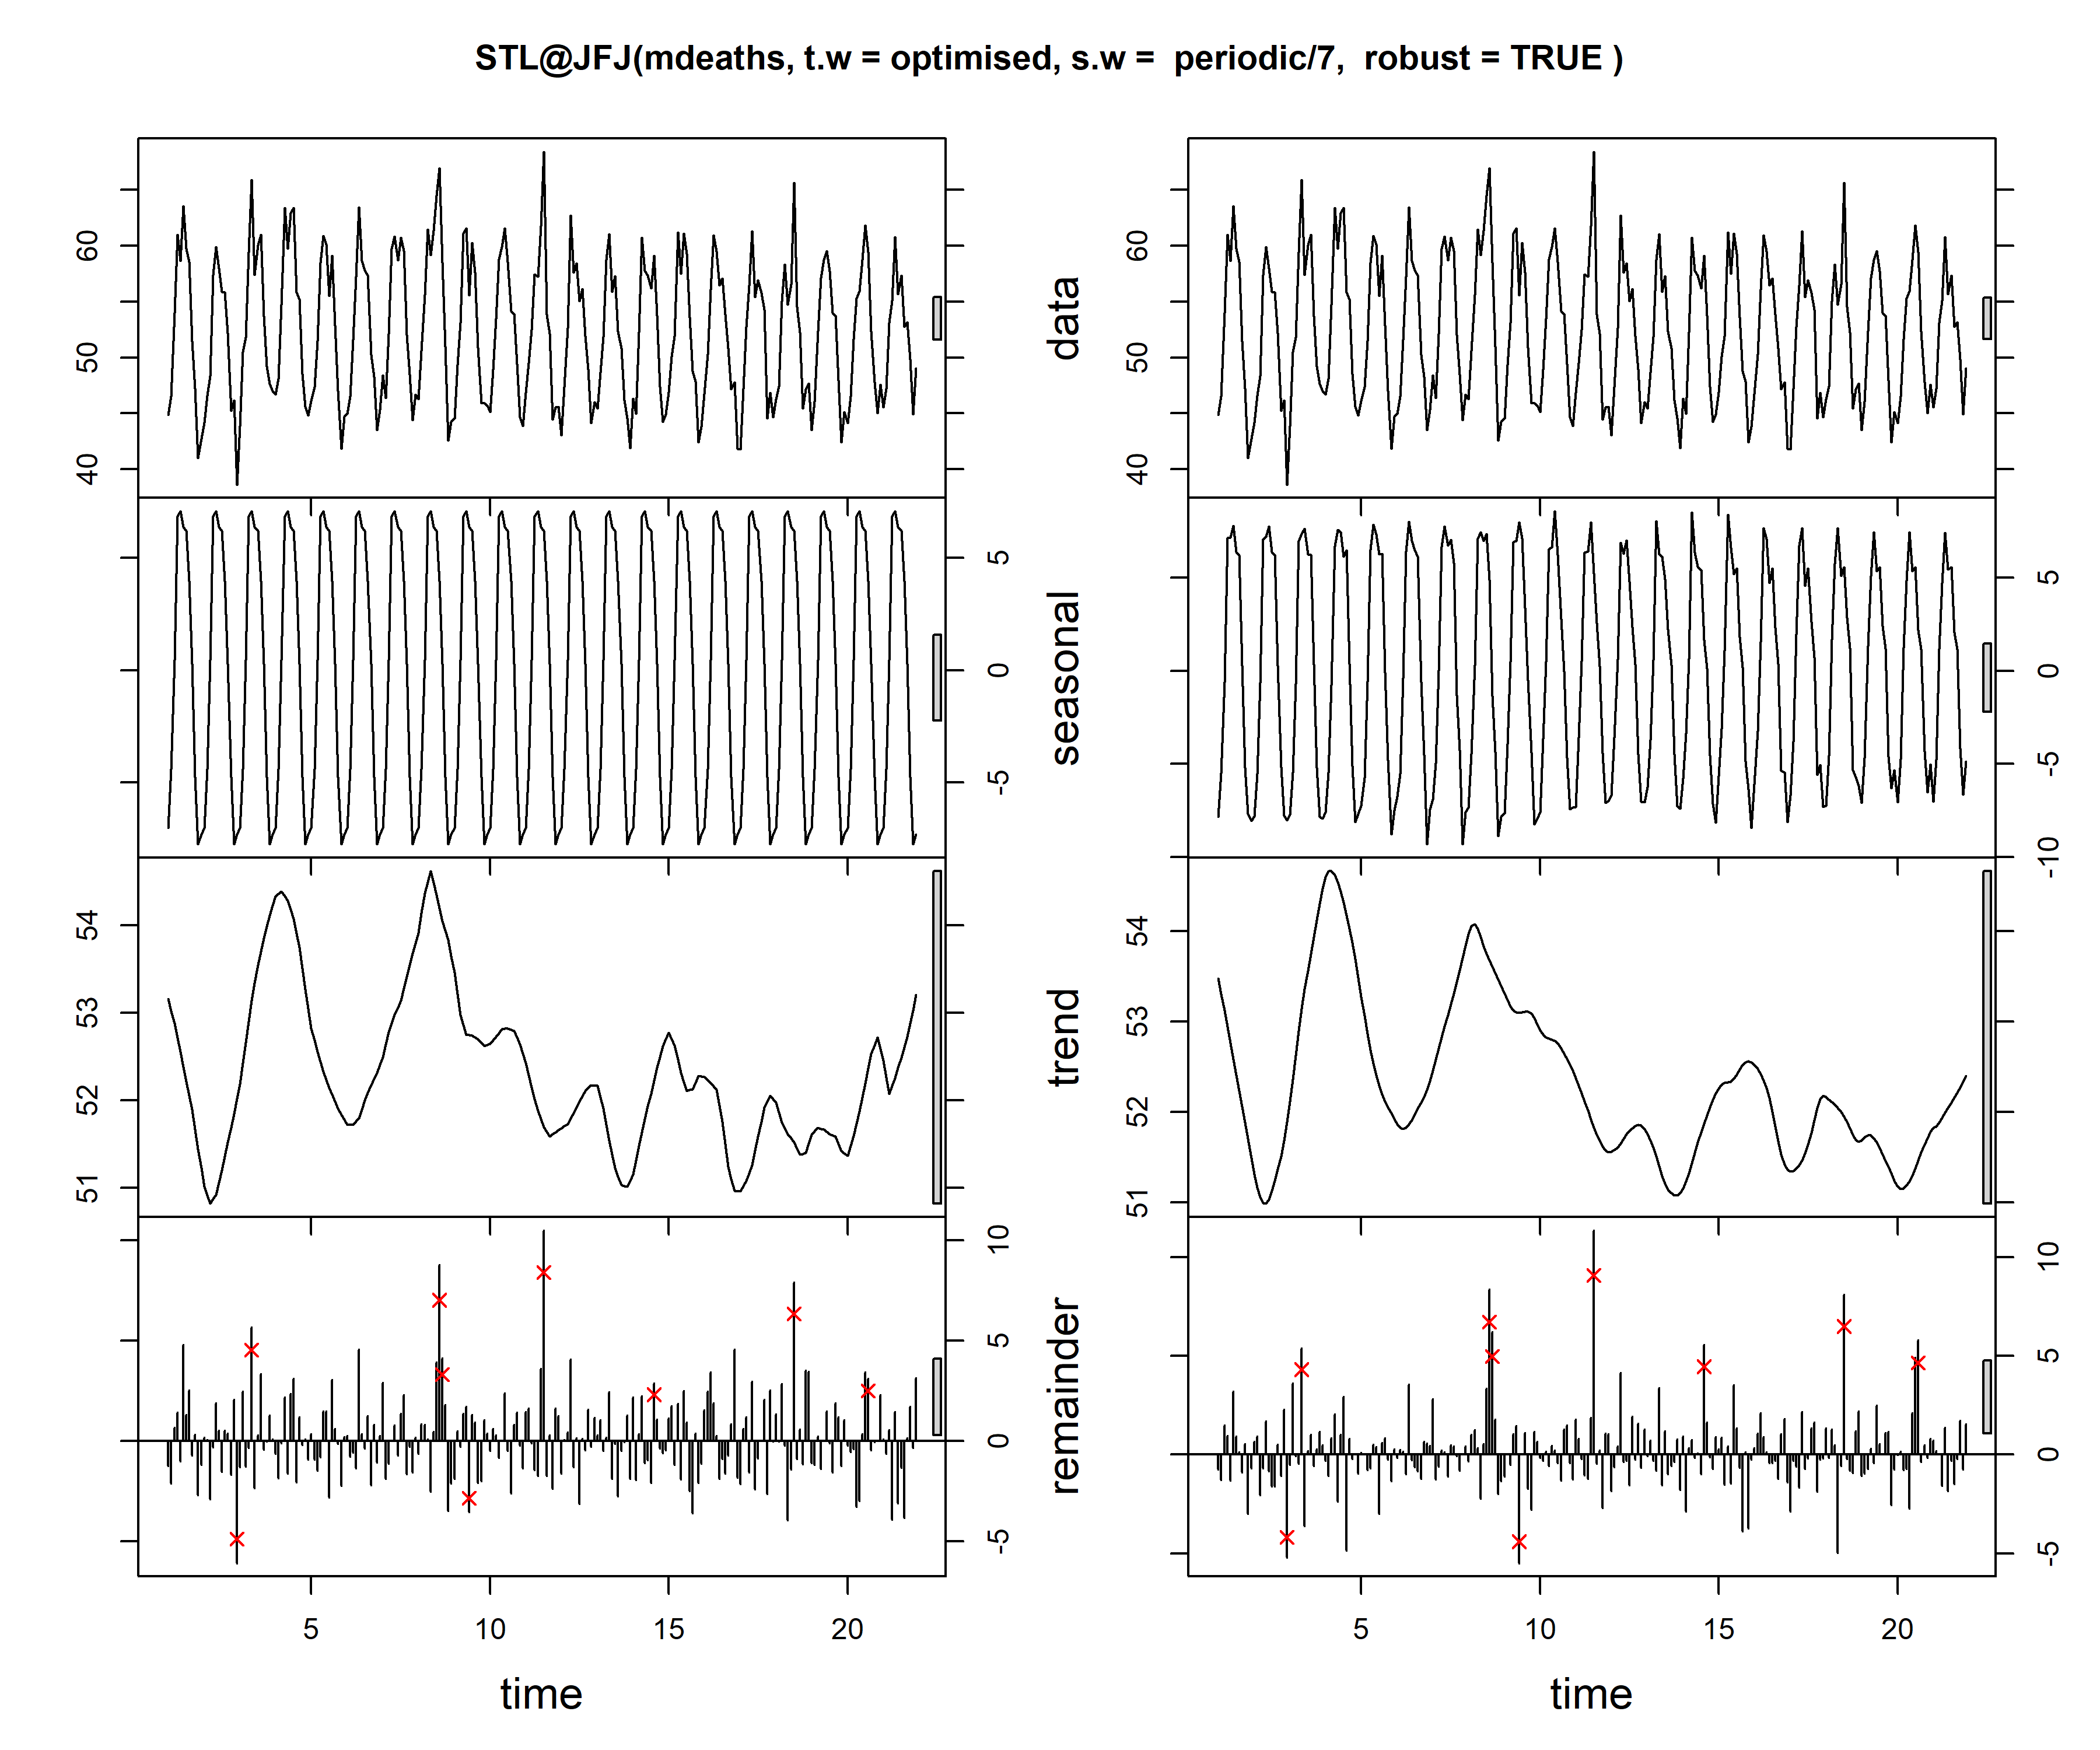


**Figure S7.** Robust STL decomposition for JFJ. Time-series of monthly O3 averages (“data”), seasonal component (“seasonal”), Loess smoothing (“trend”) and residuals (“reminder) for JFJ. Robust STL has been run by replacing the seasonal smoothing by taking the mean seasonal cycle (left) and by setting the seasonal smoothing parameter t = 7 (right). The red crosses denotes points identified as “outliers”.


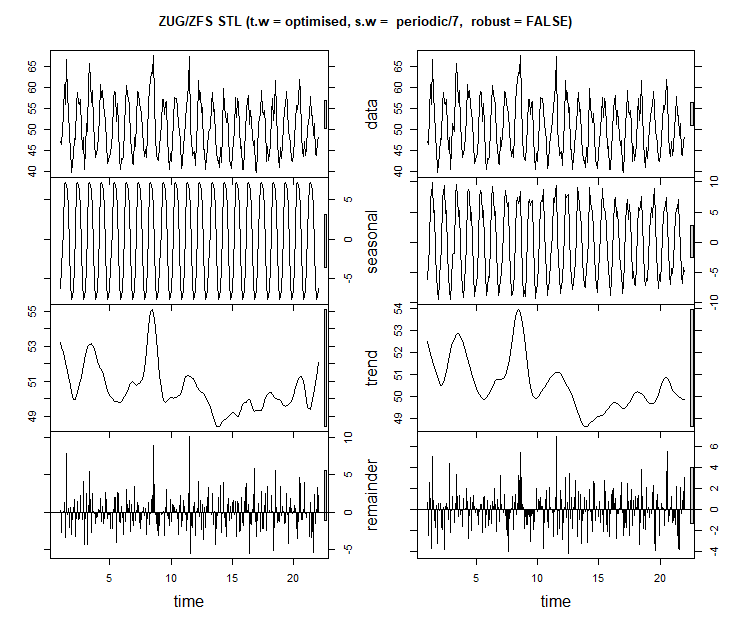


**Figure S8.** Not robust STL decomposition for ZUG/ZSF. Time-series of monthly O3 averages (“data”), seasonal component (“seasonal”), Loess smoothing (“trend”) and residuals (“reminder) for JFJ. ZUG/ZSF has been run by replacing the seasonal smoothing by taking the mean seasonal cycle (left) and by setting the seasonal smoothing parameter t = 7 (right).


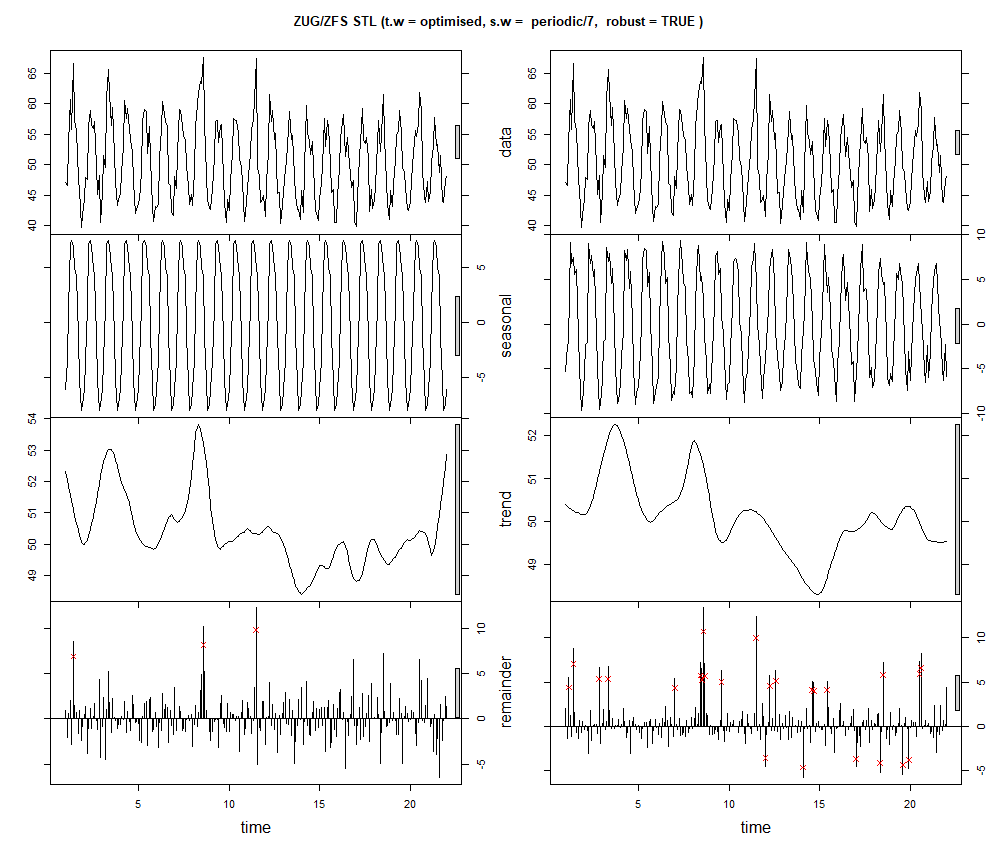


**Figure S9.** Robust STL decomposition for ZUG/ZSF. Time-series of monthly O3 averages (“data”), seasonal component (“seasonal”), Loess smoothing (“trend”) and residuals (“reminder) for ZUG/ZSF. Robust STL has been run by replacing the seasonal smoothing by taking the mean seasonal cycle (left) and by setting the seasonal smoothing parameter t = 7 (right). The red crosses denotes points identified as “outliers”.


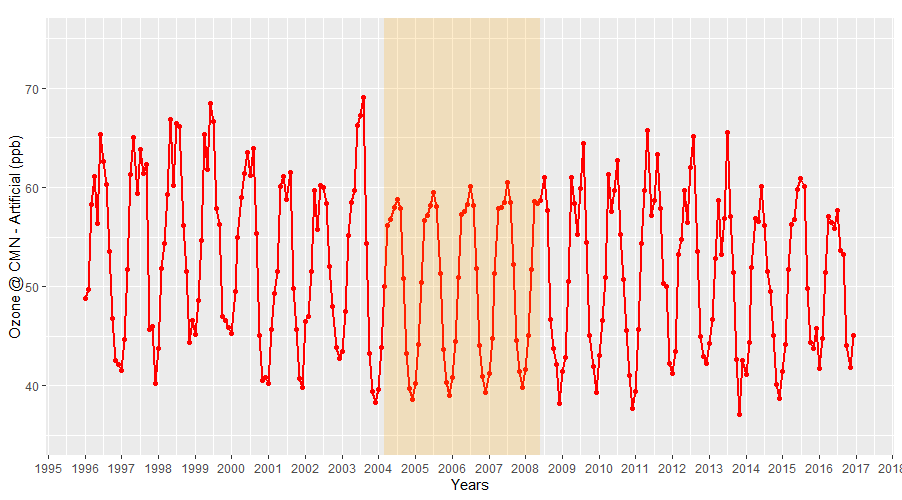


**Figure S10**. Artificial O3 time series at CMN. The period of the “persistent” O3 episodes (orange shaded area) was substituted with an artificial time series obtained by applying the “robust” periodic STL decomposition to the original monthly O3 time series.

**
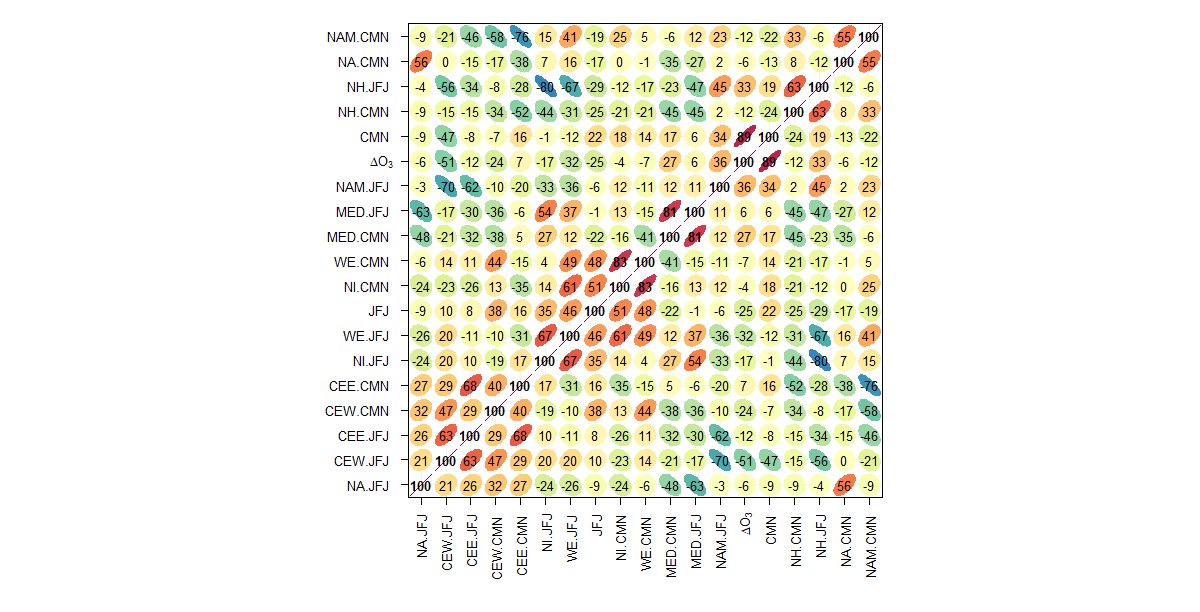
**

**Figure S11.** Linear correlation matrix between the seasonal O3, O3 at CMN, O3 at JFJ and the SRRtot/SRRreg values for the different source regions at both the measurement sites (DJF 1996 – 2016). The shape of ellipses provides a visual representation of the scatter plot for each couple of variables, the numbers and the colour code give representation of the R value (green: negative slope of correlation, red: positive slope of correlation).

**
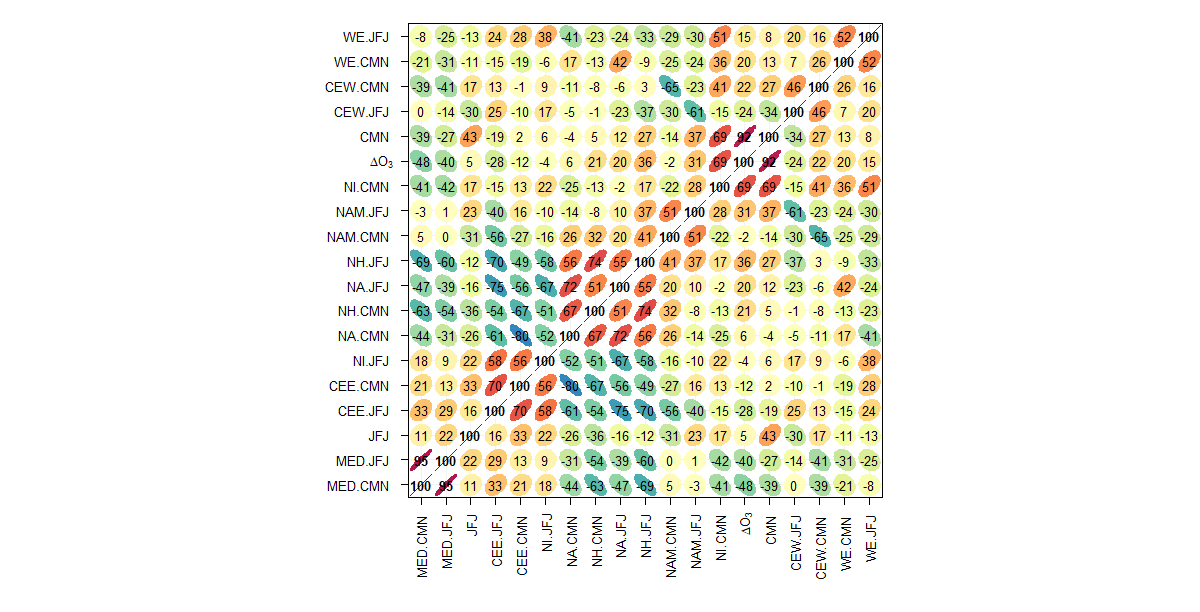
**

**Figure S12. Title.** Linear correlation matrix between the seasonal O3, O3 at CMN, O3 at JFJ and the SRRtot/SRRreg values for the different source regions at both the measurement sites (MAM 1996 – 2016).

The shape of ellipses provides a visual representation of the scatter plot for each couple of variables, the numbers and the colour code give representation of the R value (green: negative slope of correlation, red: positive slope of correlation).

**
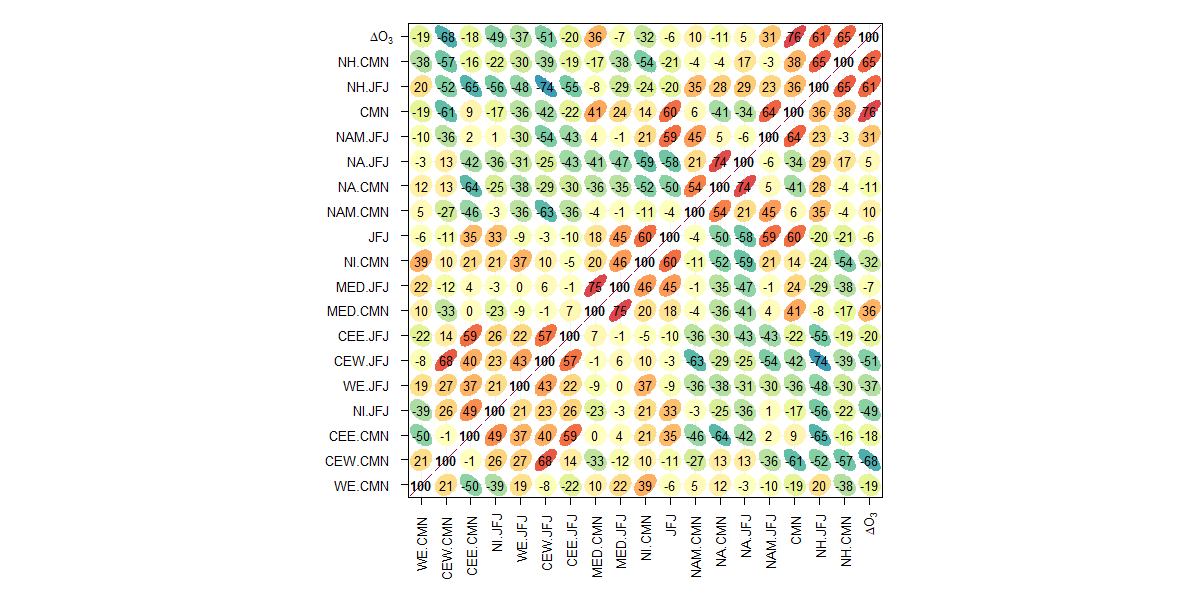
**

**Figure S13. Title.** Linear correlation matrix between the seasonal O3, O3 at CMN, O3 at JFJ and the SRRtot/SRRreg values for the different source regions at both the measurement sites (JJA 1996 – 2016). The shape of ellipses provides a visual representation of the scatter plot for each couple of variables, the numbers and the colour code give representation of the R value (green: negative slope of correlation, red: positive slope of correlation).

**
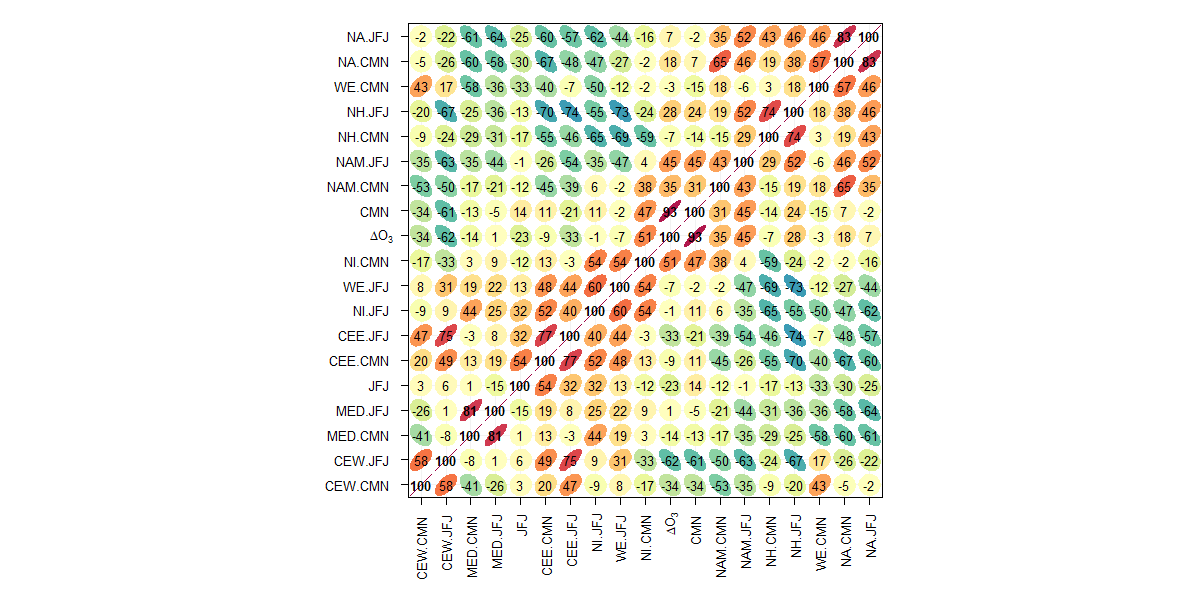
**

**Figure S14. Title.** Linear correlation matrix between the seasonal O3, O3 at CMN, O3 at JFJ and the SRRtot/SRRreg values for the different source regions at both the measurement sites (SON 1996 – 2016).

The shape of ellipses provides a visual representation of the scatter plot for each couple of variables, the numbers and the colour code give representation of the R value (green: negative slope of correlation, red: positive slope of correlation).


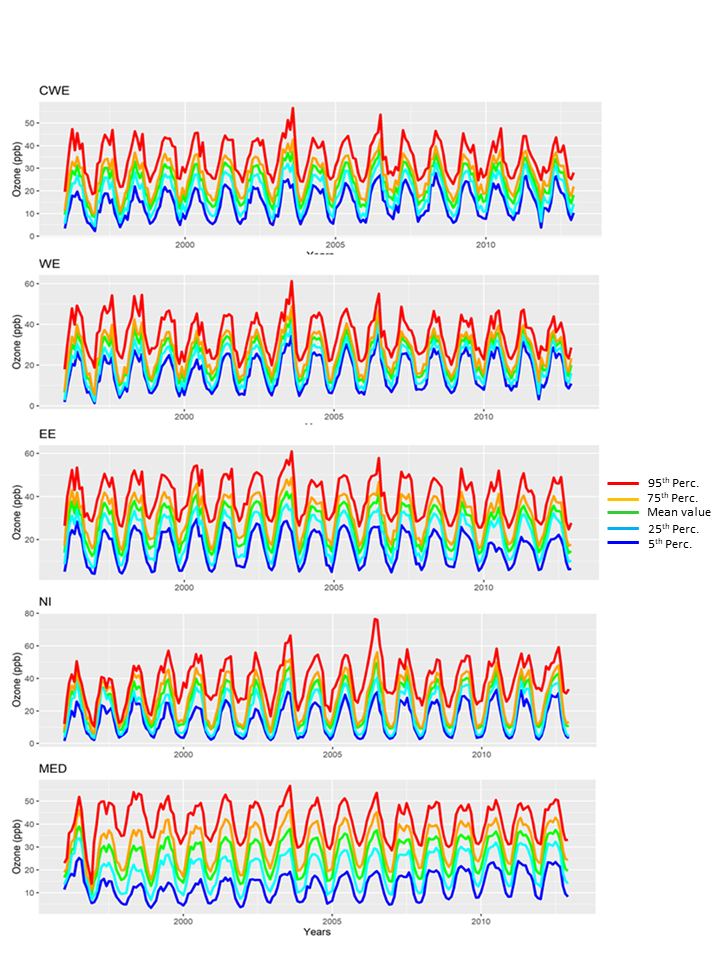


**Figure S15. Title.** Time series of average monthly O3 values and monthly percentiles for the five “source” regions. Monthly mean values are reported by the green lines, monthly 5th percentiles by blue lines, 25th percentiles by the cyan lines, 75th percentiles by the orange lines and 95th percentiles by red lines.


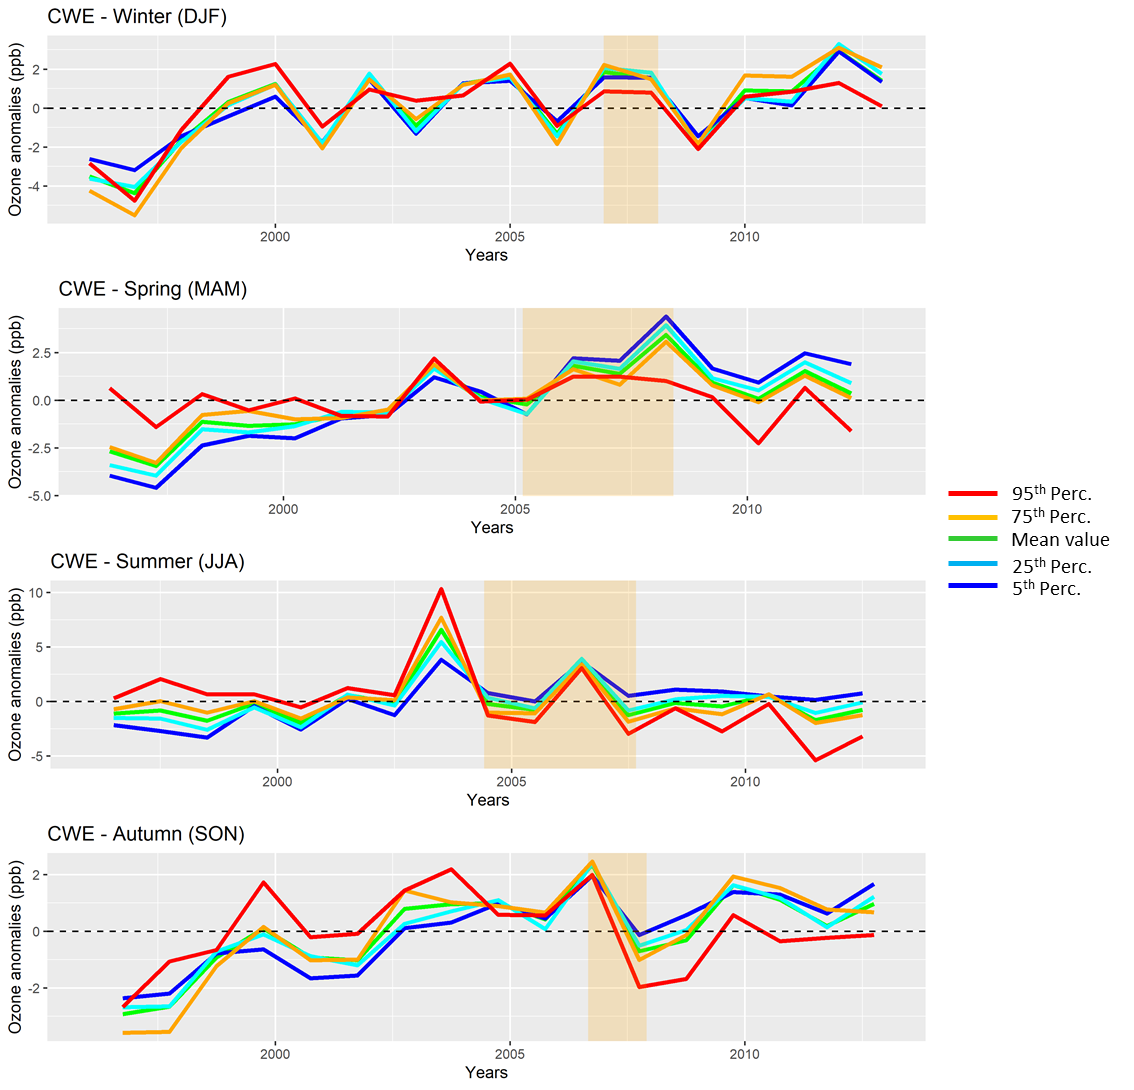


**Figure S16. Title.** Time series of seasonal O3 anomalies for the CWE “source” region. Anomalies of O3 mean seasonal values are reported by the green lines, monthly 5th percentiles by blue lines, 25th percentiles by the cyan lines, 75th percentiles by the orange lines and 95th percentiles by red lines. The orange shaded area denote the period of “persistent” O3 episodes at CMN.

**
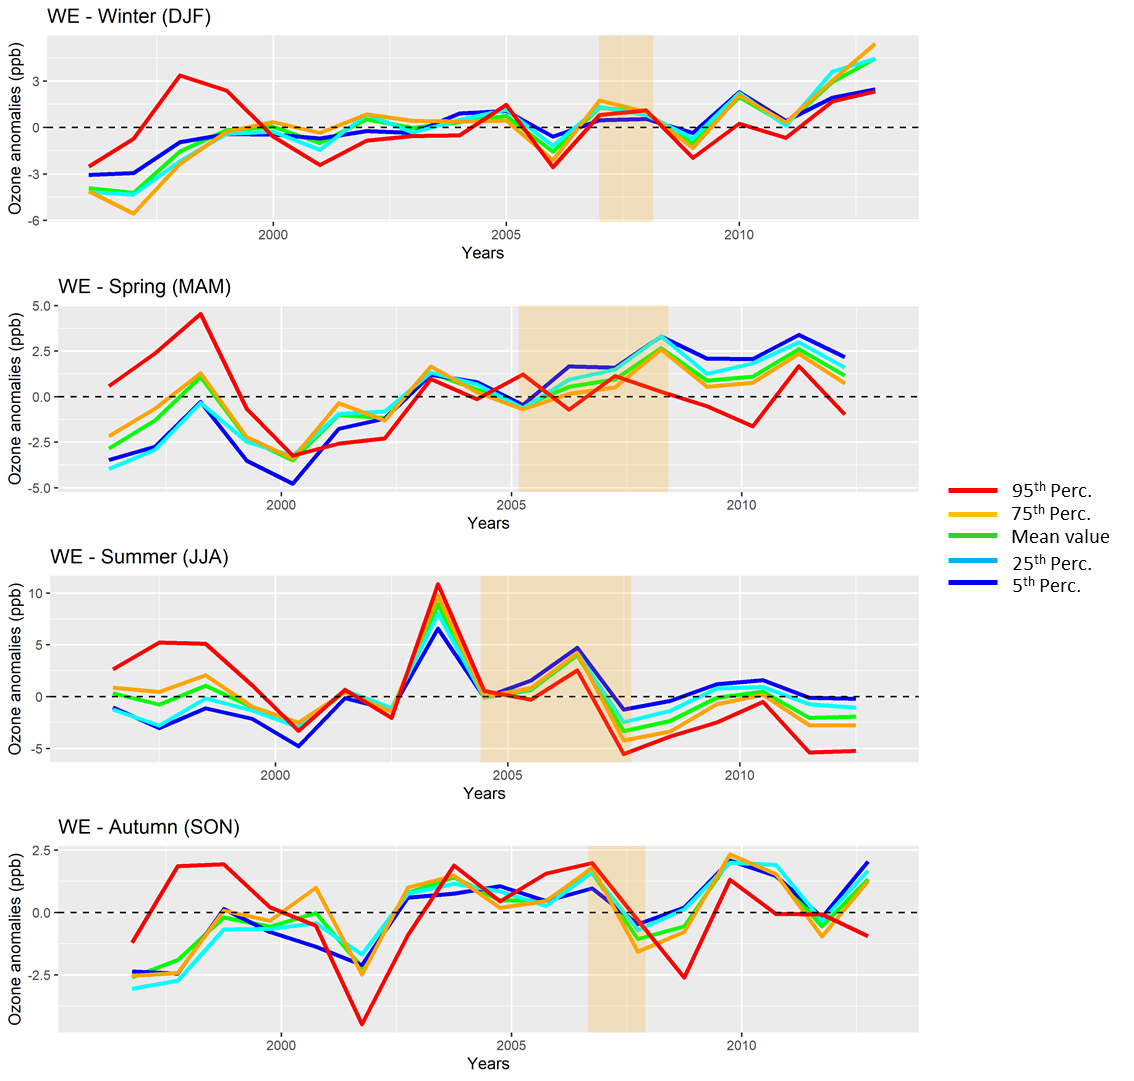
Figure S17. Title.** Time series of seasonal O3 anomalies for the WE “source” region. Anomalies of O3 mean seasonal values are reported by the green lines, monthly 5th percentiles by blue lines, 25th percentiles by the cyan lines, 75th percentiles by the orange lines and 95th percentiles by red lines. The orange shaded area denote the period of “persistent” O3 episodes at CMN.

**
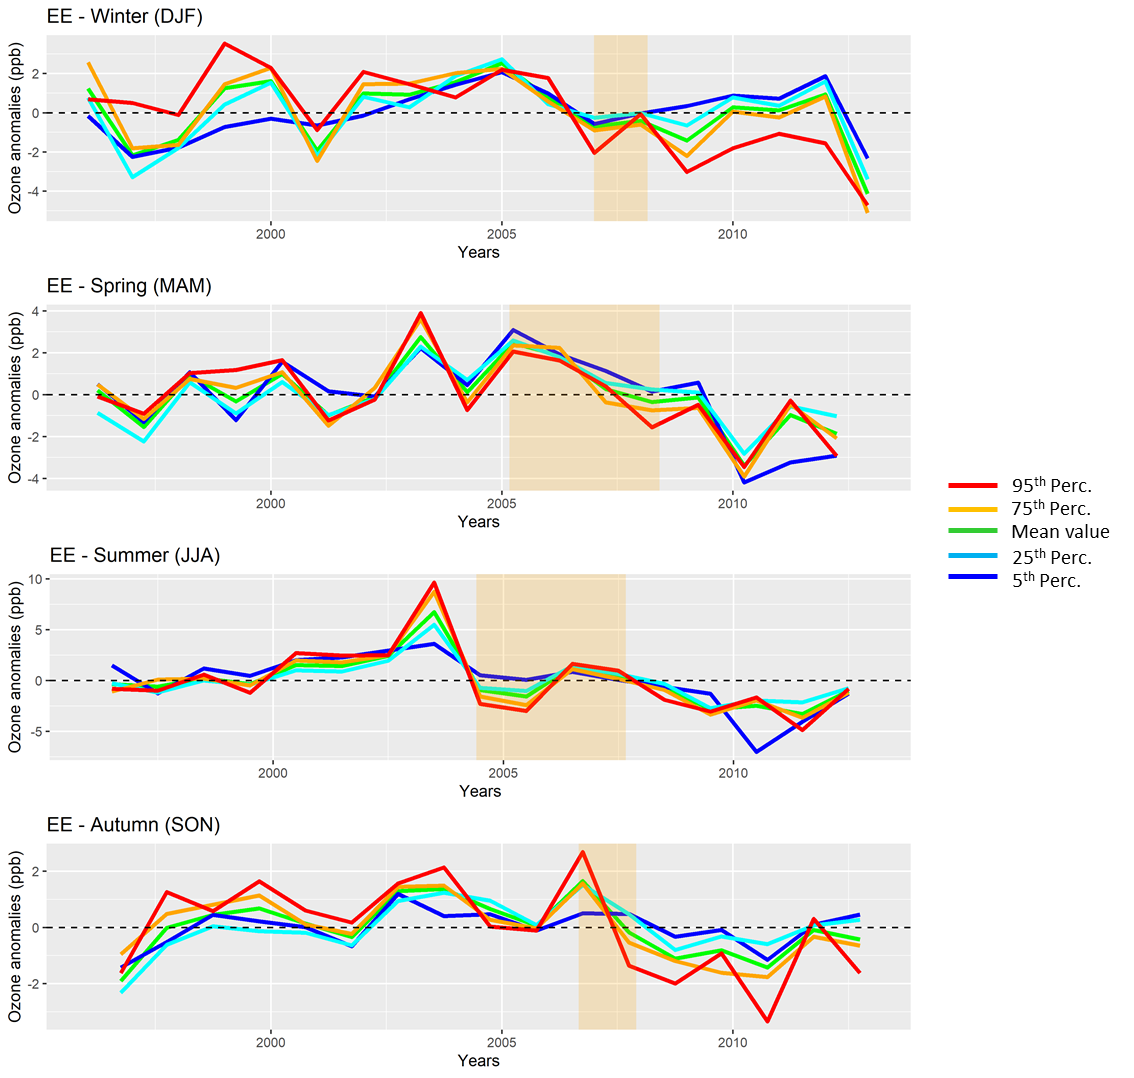
Figure S18. Title.** Time series of seasonal O3 anomalies for the CEE “source” region. Anomalies of O3 mean seasonal values are reported by the green lines, monthly 5th percentiles by blue lines, 25th percentiles by the cyan lines, 75th percentiles by the orange lines and 95th percentiles by red lines. The orange shaded area denote the period of “persistent” O3 episodes at CMN.

**
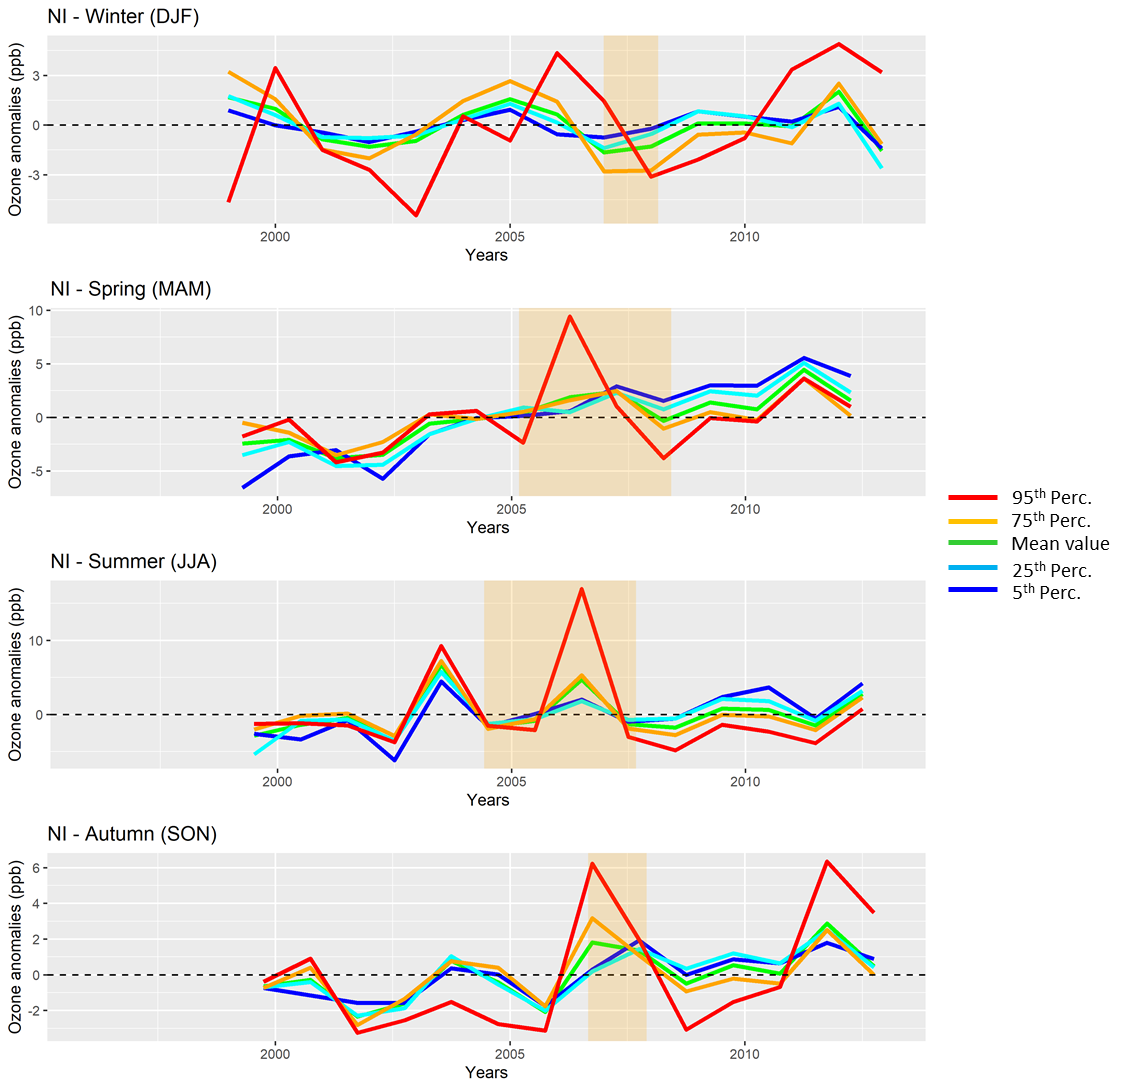
Figure S19. Title.** Time series of seasonal O3 anomalies for the NI “source” region. Anomalies of O3 mean seasonal values are reported by the green lines, monthly 5th percentiles by blue lines, 25th percentiles by the cyan lines, 75th percentiles by the orange lines and 95th percentiles by red lines. The orange shaded area denote the period of “persistent” O3 episodes at CMN.

**
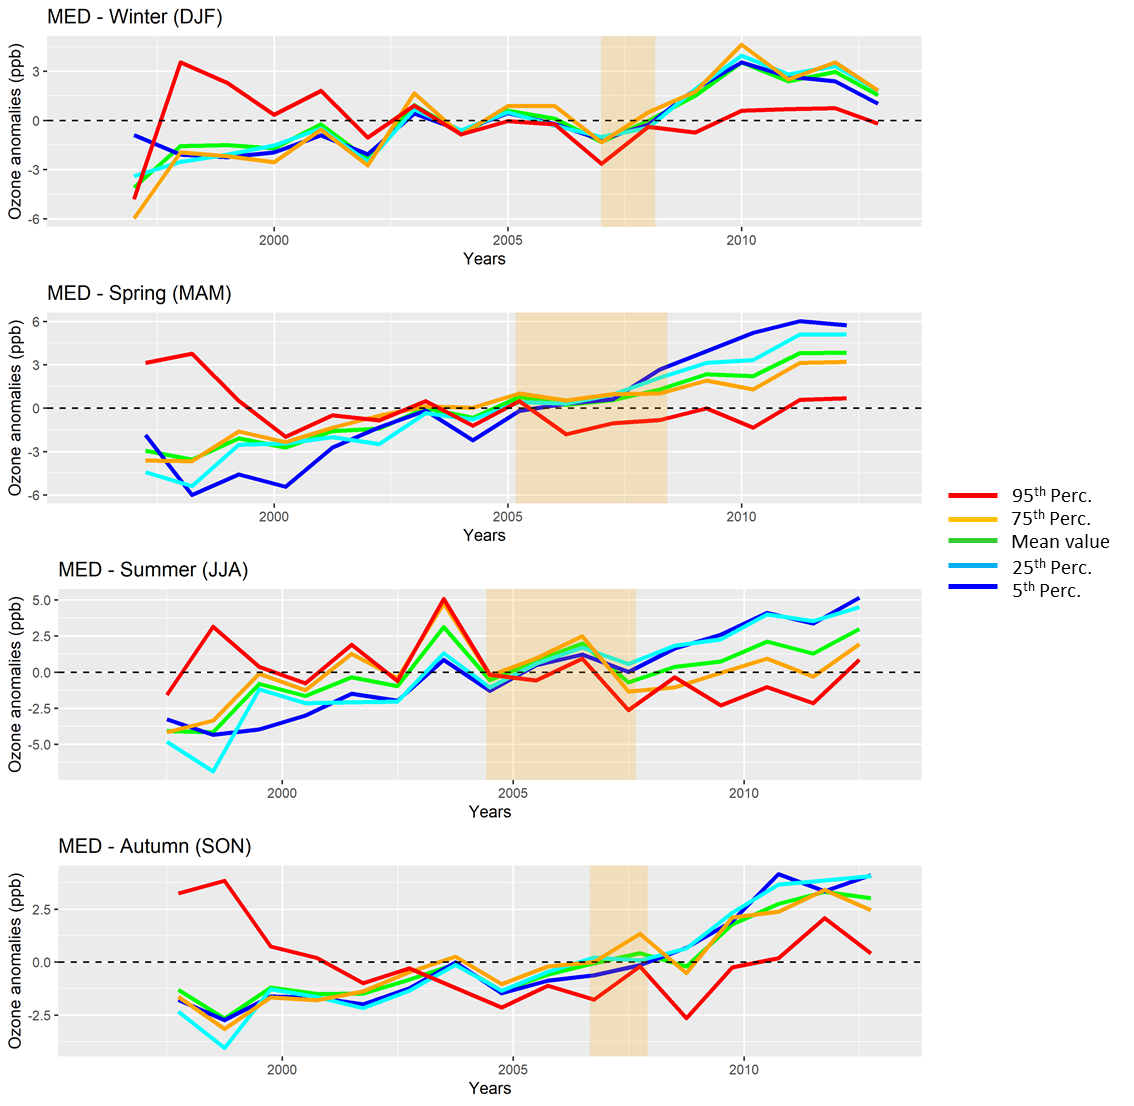
Figure S20. Title.** Time series of seasonal O3 anomalies for the MED “source” region. Anomalies of O3 mean seasonal values are reported by the green lines, monthly 5th percentiles by blue lines, 25th percentiles by the cyan lines, 75th percentiles by the orange lines and 95th percentiles by red lines. The orange shaded area denote the period of “persistent” O3 episodes at CMN.

**Figure S21.** Analysis of the relationship between the seasonal difference of O3 between CMN and JFJ together with air mass transport contributions from the European “source” regions and the seasonal near-surface O3 anomalies over these regions. Scatterplots of mean seasonal differences of O3 at CMN and JFJ (Ozone), with SRRreg/SRRtot over the European “source” regions (i.e. CWE: Continental West Europe; WE: West Europe; CEE: Continental East Europe; NI: North Italy; MED: Mediterranean basin) as a function of the seasonal 95th percentiles of near-surface O3 over these regions (as deduced by the Airbase dataset analysis).

**Table S1**. O3 trends/tendencies based on observed O3 monthly values. Trend/tendency values are expressed as ppb/year. P-values are reported for the linear regression model and for the Mann – Kendall test. For the Theil-Sen estimator, the 95% confidence intervals obtained by the bootstrap analysis were reported. Different data selection are considered: all data, nighttime and daytime.

| **Site name** | **Data Selection** | **Linear model** | **Theil - Sen** | **Mann – Kendall** |
| --- | --- | --- | --- | --- |
| CMN | All data | -0.19 0.04,  p < 0.01 | -0.22 [-0.48, -0.05] | p = 0.010 |
| Nighttime | -0.19 0.04,  p < 0.01 | -0.21 [-0.43, 0.05] | p = 0.016 |
| Daytime | -0.22 0.04,  p < 0.01 | -0.24 [-0.49, 0.03] | p = 0.010 |
| JFJ | All data | -0.04 0.02,  p > 0.10 | -0.06 [-0.28, 0.12] | p = 0.34 |
| Nighttime | -0.04 0.02,  p > 0.10 | -0.06 [-0.28, 0.13] | p = 0.36 |
| Daytime | -0.04 0.02,  p = 0.01 | -0.08 [-0.28, 0.12] | p = 0.22 |
| ZUG/ZSF | All data | -0.10 0.02,  p < 0.01 | -0.11 [-0.32, 0.09] | p = 0.10 |
| Nighttime | -0.10 0.02,  p < 0.01 | -0.11 [-0.31, 0.10] | p = 0.10 |
| Daytime | -0.11 0.02,  p < 0.01 | -0.12 [-0.31, 0.09] | p = 0.06 |

**Acknowledgments**

Figures S11 – S14 are produced by the “Openair” R package (Carslaw and Ropkins, 2012; Carslaw, 2019).

**References**

Carslaw, D.C. and K. Ropkins, (2012). Openair — an R package for air quality data analysis. Environmental Modelling & Software. Volume 27-28, pp. 52–61.

Carslaw, D.C. (2019). The openair manual — open-source tools for analysing air pollution data. Manual for version 2.6-5, University of York.
